# Supplementary material for: Li6Zn3(BO3)4: a new zincoborate featuring vertex-, edge- and face-sharing LiO4tetrahedra and exhibiting reversible phase transitions
Source: Royal Society of Chemistry journal article supplement (doi:10.1039/c7qi00183e), 2017-01-01
Supplement: c7qi00183e1.pdf [file c7qi00183e1.pdf]

## Electronic Supplementary Information

### **Li<sub>6</sub>Zn<sub>3</sub>(BO<sub>3</sub>)<sub>4</sub>: A New Zincoborate Featuring Vertex-, Edge- and Face-sharing LiO<sub>4</sub> Tetrahedra Configuration with Reversible Phase Transitions**

Yanna Chen,<sup>a,b,†</sup> Donghai An,<sup>c,†</sup> Min Zhang,<sup>\*a</sup> Cong Hu,<sup>a,b</sup>

Miriding Mutailipu,<sup>a,b</sup> Zhihua Yang,<sup>a</sup> Xiaoquan Lu<sup>d</sup> and Shilie Pan<sup>\*a</sup>

<sup>a</sup>Key Laboratory of Functional Materials and Devices for Special Environments of CAS, Xinjiang Technical Institute of Physics & Chemistry of CAS, Xinjiang Key Laboratory of Electronic Information Materials and Devices, 40-1 South Beijing Road, Urumqi 830011, China

<sup>b</sup>University of the Chinese Academy of Sciences, Beijing 100049, China

<sup>c</sup>Department of Physics, Changji University, 77 North Beijing Road, Changji 831100, China

<sup>d</sup>State Key Laboratory of Chemical Resource Engineering, Beijing University of Chemical Technology, Chaoyang District, North Third Ring Road 15, Beijing 100029, China

\*Corresponding authors, E-mails: zhangmin@ms.xjb.ac.cn; slpan@ms.xjb.ac.cn

Table S1. Atomic coordinates, equivalent isotropic displacement parameters and bond valence sum (BVS) for  $\text{Li}_6\text{Zn}_3(\text{BO}_3)_4$

| Atoms | Wyckoff positions | <i>x</i>  | <i>y</i>  | <i>z</i> | U(eq) | BVS   |
|-------|-------------------|-----------|-----------|----------|-------|-------|
| Li(1) | 2i                | 7630(20)  | 958(12)   | 650(10)  | 10(2) | 1.032 |
| Li(2) | 2i                | 7870(30)  | 3876(15)  | 5435(13) | 28(3) | 0.946 |
| Li(3) | 2i                | 12920(20) | 3698(11)  | 8238(9)  | 5(2)  | 1.052 |
| Li(4) | 2i                | 8740(20)  | 5330(12)  | 8144(10) | 11(2) | 1.035 |
| Li(5) | 2i                | 3800(30)  | -1473(17) | 5829(12) | 25(3) | 1.053 |
| Li(6) | 2i                | 2640(30)  | 767(13)   | 7772(12) | 20(3) | 1.035 |
| Zn(1) | 2i                | 1430(2)   | 2769(1)   | 3473(1)  | 13(1) | 1.963 |
| Zn(2) | 2i                | 3445(2)   | 2682(1)   | 546(1)   | 11(1) | 2.016 |
| Zn(3) | 2i                | 7550(2)   | 787(1)    | 6904(1)  | 13(1) | 2.002 |
| B(1)  | 2i                | -2104(17) | 3050(8)   | -667(7)  | 12(2) | 2.992 |
| B(2)  | 2i                | 6879(16)  | 4120(8)   | 3031(6)  | 9(1)  | 2.944 |
| B(3)  | 2i                | 2161(16)  | 2058(8)   | 5698(7)  | 10(2) | 2.990 |
| B(4)  | 2i                | 7216(17)  | -552(8)   | 8145(7)  | 14(2) | 2.931 |
| O(1)  | 2i                | -495(9)   | 2821(5)   | 317(4)   | 10(1) | 1.969 |
| O(2)  | 2i                | 5694(9)   | 41(5)     | 7375(4)  | 11(1) | 2.073 |
| O(3)  | 2i                | -189(10)  | 4385(5)   | 3179(4)  | 11(1) | 2.073 |
| O(4)  | 2i                | 3818(10)  | 825(5)    | 920(4)   | 12(1) | 1.958 |
| O(5)  | 2i                | 1344(10)  | 1819(5)   | 6677(4)  | 12(1) | 2.003 |
| O(6)  | 2i                | 299(10)   | 2363(5)   | 4845(4)  | 15(1) | 2.001 |
| O(7)  | 2i                | 4997(10)  | 2836(5)   | -772(4)  | 13(1) | 2.059 |
| O(8)  | 2i                | 5237(9)   | 4445(5)   | 2105(4)  | 11(1) | 1.914 |
| O(9)  | 2i                | 9084(10)  | 3500(5)   | 8499(4)  | 12(1) | 2.014 |
| O(10) | 2i                | 4882(10)  | 2040(5)   | 5602(4)  | 14(1) | 1.986 |
| O(11) | 2i                | 5657(10)  | 3522(6)   | 3807(4)  | 16(1) | 1.943 |
| O(12) | 2i                | 297(9)    | 849(5)    | 2032(4)  | 10(1) | 1.994 |

Table S2. Selected bond lengths (Å) and angles (deg) for Li<sub>6</sub>Zn<sub>3</sub>(BO<sub>3</sub>)<sub>4</sub>

|                           |           |                                              |           |
|---------------------------|-----------|----------------------------------------------|-----------|
| Zn(1)-O(6)                | 1.938(5)  | Li(5)-O(10) <sup>#3</sup>                    | 1.944(14) |
| Zn(1)-O(11)               | 1.955(5)  | Li(5)-O(11) <sup>#3</sup>                    | 2.165(15) |
| Zn(1)-O(3)                | 1.972(4)  | Li(6)-O(2)                                   | 1.905(13) |
| Zn(1)-O(12)               | 2.008(5)  | Li(6)-O(12) <sup>#1</sup>                    | 1.935(12) |
| Zn(2)-O(7)                | 1.912(5)  | Li(6)-O(5)                                   | 1.944(13) |
| Zn(2)-O(1)                | 1.956(4)  | Li(6)-O(7) <sup>#13</sup>                    | 2.114(14) |
| Zn(2)-O(4)                | 1.969(4)  | B(1)-O(9) <sup>#5</sup>                      | 1.364(9)  |
| Zn(2)-O(8)                | 1.998(5)  | B(1)-O(7) <sup>#4</sup>                      | 1.374(9)  |
| Zn(3)-O(10)               | 1.931(5)  | B(1)-O(1)                                    | 1.378(9)  |
| Zn(3)-O(5) <sup>#9</sup>  | 1.947(5)  | B(2)-O(11)                                   | 1.374(9)  |
| Zn(3)-O(2)                | 1.965(4)  | B(2)-O(3) <sup>#9</sup>                      | 1.376(9)  |
| Zn(3)-O(9)                | 2.001(5)  | B(2)-O(8)                                    | 1.384(8)  |
| Li(1)-O(12) <sup>#9</sup> | 1.935(12) | B(3)-O(6)                                    | 1.368(9)  |
| Li(1)-O(4)                | 1.958(12) | B(3)-O(5)                                    | 1.369(9)  |
| Li(1)-O(1) <sup>#9</sup>  | 1.964(11) | B(3)-O(10)                                   | 1.380(9)  |
| Li(1)-O(4) <sup>#8</sup>  | 2.016(12) | B(4)-O(12) <sup>#3</sup>                     | 1.373(9)  |
| Li(2)-O(3) <sup>#2</sup>  | 1.902(15) | B(4)-O(4) <sup>#3</sup>                      | 1.378(9)  |
| Li(2)-O(11)               | 1.923(15) | B(4)-O(2)                                    | 1.388(9)  |
| Li(2)-O(10)               | 2.074(14) | O(9) <sup>#5</sup> -B(1)-O(7) <sup>#4</sup>  | 120.3(6)  |
| Li(2)-O(6) <sup>#9</sup>  | 2.158(14) | O(9) <sup>#5</sup> -B(1)-O(1)                | 122.7(6)  |
| Li(3)-O(7) <sup>#11</sup> | 1.886(11) | O(7) <sup>#4</sup> -B(1)-O(1)                | 117.0(6)  |
| Li(3)-O(9)                | 1.958(11) | O(11)-B(2)-O(3) <sup>#9</sup>                | 118.7(6)  |
| Li(3)-O(8) <sup>#7</sup>  | 1.961(11) | O(11)-B(2)-O(8)                              | 121.8(6)  |
| Li(3)-O(5) <sup>#9</sup>  | 2.054(11) | O(3) <sup>#9</sup> -B(2)-O(8)                | 119.5(6)  |
| Li(4)-O(3) <sup>#2</sup>  | 1.919(12) | O(6)-B(3)-O(5)                               | 119.4(6)  |
| Li(4)-O(9)                | 1.931(11) | O(6)-B(3)-O(10)                              | 120.8(6)  |
| Li(4)-O(8) <sup>#2</sup>  | 2.001(12) | O(5)-B(3)-O(10)                              | 119.7(6)  |
| Li(4)-O(1) <sup>#2</sup>  | 2.024(12) | O(12) <sup>#3</sup> -B(4)-O(4) <sup>#3</sup> | 121.4(6)  |
| Li(5)-O(2)                | 1.890(14) | O(12) <sup>#3</sup> -B(4)-O(2)               | 119.9(6)  |
| Li(5)-O(6) <sup>#1</sup>  | 1.900(13) | O(4) <sup>#3</sup> -B(4)-O(2)                | 118.6(6)  |

Symmetry transformations used to generate equivalent atoms: #1 -x,-y,-z+1 #2 -x+1,-y+1,-z+1 #3 -x+1,-y,-z+1

#4 x-1,y,z #5 x-1,y,z-1 #7 -x+2,-y+1,-z+1 #8 -x+1,-y,-z #9 x+1,y,z #11 x+1,y,z+1 #13 x,y,z+1

Table S3. The basic information of the existing anhydrous and disorder-free lithium - containing borates

| NO. | Chemical formula                                                                              | Li-O units       | Li-O configuration | Dimension of Li-O structure | B-O configuration                                                    | ICSD number       |
|-----|-----------------------------------------------------------------------------------------------|------------------|--------------------|-----------------------------|----------------------------------------------------------------------|-------------------|
| 1   | LiGd <sub>6</sub> O <sub>5</sub> (BO <sub>3</sub> ) <sub>3</sub>                              | LiO <sub>3</sub> | Isolated           | 0D                          | Isolated BO <sub>3</sub>                                             | 50685             |
| 2   | LiY <sub>6</sub> O <sub>5</sub> (BO <sub>3</sub> ) <sub>3</sub>                               | LiO <sub>3</sub> | Isolated           | 0D                          | Isolated BO <sub>3</sub>                                             | 160603            |
| 3   | Sr <sub>2</sub> Li(BeB <sub>3</sub> O <sub>8</sub> )                                          | LiO <sub>3</sub> | Isolated           | 0D                          | Isolated BO <sub>3</sub> +<br>Isolated B <sub>2</sub> O <sub>5</sub> | 262730            |
| 4   | SrLi(B <sub>9</sub> O <sub>15</sub> )                                                         | LiO <sub>3</sub> | Isolated           | 0D                          | BO <sub>3</sub> +BO <sub>4</sub><br>network                          | 93015             |
| 5   | LiBaB <sub>9</sub> O <sub>15</sub>                                                            | LiO <sub>3</sub> | Isolated           | 0D                          | BO <sub>3</sub> +BO <sub>4</sub><br>network                          | 426537/<br>183692 |
| 6   | Rb <sub>2</sub> LiNd(BO <sub>3</sub> ) <sub>2</sub>                                           | LiO <sub>4</sub> | Isolated           | 0D                          | Isolated BO <sub>3</sub>                                             | 430190            |
| 7   | Cs <sub>2</sub> LiNd(BO <sub>3</sub> ) <sub>2</sub>                                           | LiO <sub>4</sub> | Isolated           | 0D                          | Isolated BO <sub>3</sub>                                             | 429483            |
| 8   | LiB(GeO <sub>4</sub> )                                                                        | LiO <sub>4</sub> | Isolated           | 0D                          | Isolated BO <sub>4</sub>                                             | 67535/<br>28106   |
| 9   | Li(B(SO <sub>4</sub> ) <sub>2</sub> )                                                         | LiO <sub>4</sub> | Isolated           | 0D                          | Isolated BO <sub>4</sub>                                             | 425174            |
| 10  | Li(AlB <sub>2</sub> O <sub>5</sub> )                                                          | LiO <sub>4</sub> | Isolated           | 0D                          | Isolated B <sub>2</sub> O <sub>5</sub>                               | 51314             |
| 11  | Li <sub>2</sub> Pb <sub>2</sub> (CuB <sub>4</sub> O <sub>10</sub> )                           | LiO <sub>4</sub> | Isolated           | 0D                          | Isolated B <sub>2</sub> O <sub>5</sub>                               | 180108            |
| 12  | Li <sub>2</sub> (AlB <sub>5</sub> O <sub>10</sub> )                                           | LiO <sub>4</sub> | Isolated           | 0D                          | Isolated B <sub>5</sub> O <sub>10</sub>                              | 279578            |
| 13  | LiBa <sub>2</sub> (B <sub>5</sub> O <sub>10</sub> )                                           | LiO <sub>4</sub> | Isolated           | 0D                          | BO <sub>3</sub> +BO <sub>4</sub><br>chain                            | 71875             |
| 14  | Li <sub>3</sub> B <sub>11</sub> O <sub>18</sub>                                               | LiO <sub>4</sub> | Isolated           | 0D                          | BO <sub>3</sub> +BO <sub>4</sub><br>network                          | 427426            |
| 15  | Li(B <sub>3</sub> O <sub>5</sub> )                                                            | LiO <sub>4</sub> | Isolated           | 0D                          | BO <sub>3</sub> +BO <sub>4</sub><br>network                          | 84617             |
| 16  | Li <sub>2</sub> O(B <sub>2</sub> O <sub>3</sub> ) <sub>3</sub>                                | LiO <sub>4</sub> | Isolated           | 0D                          | BO <sub>3</sub> +BO <sub>4</sub><br>network                          | 38206             |
| 17  | Li <sub>3</sub> (B <sub>7</sub> O <sub>12</sub> )                                             | LiO <sub>4</sub> | Isolated           | 0D                          | BO <sub>3</sub> +BO <sub>4</sub><br>network                          | 68475             |
| 18  | Li <sub>2</sub> Sr <sub>4</sub> B <sub>12</sub> O <sub>23</sub>                               | LiO <sub>4</sub> | Isolated           | 0D                          | BO <sub>3</sub> +BO <sub>4</sub><br>network                          | 424308            |
| 19  | CsLi(B <sub>6</sub> O <sub>10</sub> )                                                         | LiO <sub>4</sub> | Isolated           | 0D                          | BO <sub>3</sub> +BO <sub>4</sub><br>network                          | 427396/<br>427409 |
| 20  | K <sub>2</sub> Ba <sub>4</sub> Ga <sub>4</sub> Li <sub>2</sub> B <sub>6</sub> O <sub>21</sub> | LiO <sub>4</sub> | Vertex-sharing     | 0D                          | Isolated BO <sub>3</sub>                                             | 291378            |
| 21  | RbLi <sub>2</sub> Ga <sub>2</sub> (BO <sub>3</sub> ) <sub>3</sub>                             | LiO <sub>4</sub> | Vertex-sharing     | 0D                          | Isolated BO <sub>3</sub>                                             | 280205            |
| 22  | Li <sub>3</sub> NaBaB <sub>6</sub> O <sub>12</sub>                                            | LiO <sub>4</sub> | Vertex-sharing     | 0D                          | Isolated<br>B <sub>12</sub> O <sub>24</sub>                          | 423774            |
| 23  | LiK(B <sub>4</sub> O <sub>7</sub> )                                                           | LiO <sub>4</sub> | Vertex-sharing     | 0D                          | BO <sub>3</sub> +BO <sub>4</sub><br>network                          | 280296            |
| 24  | LiNaB <sub>4</sub> O <sub>7</sub>                                                             | LiO <sub>4</sub> | Vertex-sharing     | 0D                          | BO <sub>3</sub> +BO <sub>4</sub><br>network                          | 416956            |

|    |                                                                                    |                  |                       |    |                                          |        |
|----|------------------------------------------------------------------------------------|------------------|-----------------------|----|------------------------------------------|--------|
| 25 | LiRb(B <sub>4</sub> O <sub>7</sub> )                                               | LiO <sub>4</sub> | Vertex-sharing        | 0D | BO <sub>3</sub> +BO <sub>4</sub> network | 280297 |
| 26 | LiMn(BO <sub>3</sub> )                                                             | LiO <sub>4</sub> | Vertex-sharing        | 1D | Isolated BO <sub>3</sub>                 | 94318  |
| 27 | LiBUO <sub>5</sub>                                                                 | LiO <sub>4</sub> | Vertex-sharing        | 1D | Isolated BO <sub>3</sub>                 | 67114  |
| 28 | LiCd(BO <sub>3</sub> )                                                             | LiO <sub>4</sub> | Vertex-sharing        | 1D | Isolated BO <sub>3</sub>                 | 20835  |
| 29 | Li <sub>3</sub> Ca <sub>9</sub> (BO <sub>3</sub> ) <sub>7</sub> (LiF) <sub>2</sub> | LiO <sub>4</sub> | Vertex-sharing        | 1D | Isolated BO <sub>3</sub>                 | 250860 |
| 30 | Cs <sub>3</sub> Na(Li <sub>2</sub> (BO <sub>3</sub> ) <sub>2</sub> )               | LiO <sub>4</sub> | Vertex-sharing        | 1D | Isolated BO <sub>3</sub>                 | 36531  |
| 31 | Li <sub>2</sub> (B <sub>4</sub> O <sub>7</sub> )                                   | LiO <sub>4</sub> | Vertex-sharing        | 1D | BO <sub>3</sub> +BO <sub>4</sub> network | 300010 |
| 32 | Li <sub>3</sub> Pr <sub>2</sub> (BO <sub>3</sub> ) <sub>3</sub>                    | LiO <sub>4</sub> | Vertex-sharing        | 2D | Isolated BO <sub>3</sub>                 | 20217  |
| 33 | LiBO <sub>2</sub>                                                                  | LiO <sub>4</sub> | Vertex-sharing        | 3D | BO <sub>4</sub> network                  | 34256  |
| 34 | Li <sub>3</sub> Sc(BO <sub>3</sub> ) <sub>2</sub>                                  | LiO <sub>4</sub> | Vertex-sharing        | 3D | Isolated BO <sub>3</sub>                 | 241234 |
| 35 | LiBe(BO <sub>3</sub> )                                                             | LiO <sub>4</sub> | edge-sharing          | 0D | Isolated BO <sub>3</sub>                 | 427287 |
| 36 | LiCd(BO <sub>3</sub> )                                                             | LiO <sub>4</sub> | edge-sharing          | 0D | Isolated BO <sub>3</sub>                 | 200615 |
| 37 | K <sub>9</sub> Li <sub>3</sub> Nd <sub>3</sub> (BO <sub>3</sub> ) <sub>7</sub>     | LiO <sub>4</sub> | edge-sharing          | 0D | Isolated BO <sub>3</sub>                 | 429855 |
| 38 | Li <sub>3</sub> BO <sub>3</sub>                                                    | LiO <sub>4</sub> | edge-sharing          | 3D | Isolated BO <sub>3</sub>                 | 9105   |
| 39 | CsLi <sub>5</sub> (BO <sub>3</sub> ) <sub>2</sub>                                  | LiO <sub>4</sub> | edge-sharing          | 3D | Isolated BO <sub>3</sub>                 | 61203  |
| 40 | LiZnBO <sub>3</sub>                                                                | LiO <sub>4</sub> | Vertex-, edge-sharing | 0D | Isolated BO <sub>3</sub>                 | /      |
| 41 | Li <sub>6</sub> CuB <sub>4</sub> O <sub>10</sub>                                   | LiO <sub>4</sub> | Vertex-, edge-sharing | 1D | Isolated B <sub>2</sub> O <sub>5</sub>   | 237526 |
| 42 | Li <sub>6</sub> (Al <sub>2</sub> (BO <sub>3</sub> ) <sub>4</sub> )                 | LiO <sub>4</sub> | Vertex-, edge-sharing | 1D | Isolated BO <sub>3</sub>                 | 20434  |
| 43 | Li <sub>3</sub> Gd(BO <sub>3</sub> ) <sub>2</sub>                                  | LiO <sub>4</sub> | Vertex-, edge-sharing | 1D | Isolated BO <sub>3</sub>                 | 94356  |
| 44 | K <sub>2</sub> LiBO <sub>3</sub>                                                   | LiO <sub>4</sub> | Vertex-, edge-sharing | 2D | Isolated BO <sub>3</sub>                 | 60949  |
| 45 | Li <sub>2</sub> (BaIO <sub>4</sub> )                                               | LiO <sub>4</sub> | Vertex-, edge-sharing | 2D | Isolated BO <sub>3</sub>                 | 50612  |
| 46 | Li <sub>3</sub> (AlB <sub>2</sub> O <sub>6</sub> )                                 | LiO <sub>4</sub> | Vertex-, edge-sharing | 2D | Isolated BO <sub>3</sub>                 | 54858  |
| 47 | Na <sub>4</sub> Li <sub>5</sub> (BO <sub>3</sub> ) <sub>3</sub>                    | LiO <sub>4</sub> | Vertex-, edge-sharing | 2D | Isolated BO <sub>3</sub>                 | 61204  |
| 48 | Li <sub>5</sub> (B(SO <sub>4</sub> ) <sub>4</sub> )                                | LiO <sub>4</sub> | Vertex-, edge-sharing | 2D | Isolated BO <sub>4</sub>                 | 428002 |
| 49 | Li <sub>6</sub> CuB <sub>4</sub> O <sub>10</sub>                                   | LiO <sub>4</sub> | Vertex-, edge-sharing | 2D | Isolated B <sub>2</sub> O <sub>5</sub>   | 247217 |
| 50 | LiBO <sub>2</sub>                                                                  | LiO <sub>4</sub> | Vertex-, edge-sharing | 2D | BO <sub>3</sub> chain                    | 37060  |
| 51 | KLi <sub>2</sub> (BO <sub>3</sub> )                                                | LiO <sub>4</sub> | Vertex-, edge-sharing | 3D | Isolated BO <sub>3</sub>                 | 48177  |
| 52 | Li <sub>8</sub> Be <sub>5</sub> B <sub>6</sub> O <sub>18</sub>                     | LiO <sub>4</sub> | Vertex-, edge-sharing | 3D | Isolated BO <sub>3</sub>                 | /      |

|    |                                                              |                                   |                                 |    |                                                                        |           |
|----|--------------------------------------------------------------|-----------------------------------|---------------------------------|----|------------------------------------------------------------------------|-----------|
| 53 | $\text{Li}_6\text{CuB}_4\text{O}_{10}$                       | $\text{LiO}_4$                    | Vertex-, edge-sharing           | 3D | Isolated $\text{B}_2\text{O}_5$                                        | 249215    |
| 54 | $\text{Li}_4\text{Cs}_3(\text{B}_7\text{O}_{14})$            | $\text{LiO}_4$                    | Vertex-, edge-sharing           | 3D | Isolated $\text{B}_7\text{O}_{14}$                                     | 261420    |
| 55 | $\text{Li}_2\text{SeB}_8\text{O}_{15}$                       | $\text{LiO}_4$                    | Isolated, vertex-sharing        | OD | $\text{BO}_3+\text{BO}_4$ network                                      | 424079    |
| 56 | $\text{Li}_5\text{Cs}_2\text{B}_7\text{O}_{14}$              | $\text{LiO}_4$                    | Isolated, vertex-, edge-sharing | 1D | $\text{BO}_3+\text{BO}_4$ chain                                        | 251863    |
| 57 | $\text{Li}_5\text{Rb}_2(\text{B}_7\text{O}_{14})$            | $\text{LiO}_4$                    | Isolated, vertex-, edge-sharing | 1D | $\text{BO}_3+\text{BO}_4$ chain                                        | 187060    |
| 58 | $\text{Li}_6\text{Be}_3\text{B}_4\text{O}_{12}$              | $\text{LiO}_4$                    | Vertex-, edge-, face-sharing    | 3D | Isolated $\text{BO}_3$                                                 | /         |
| 59 | $\text{Li}_6\text{Zn}_3\text{B}_4\text{O}_{12}$              | $\text{LiO}_4$                    | Vertex-, edge-, face-sharing    | 3D | Isolated $\text{BO}_3$                                                 | This work |
| 60 | $(\text{Li}_2((\text{SO}_2)_8(\text{B}_{12}\text{Cl}_{12}))$ | $\text{LiO}_5$                    | Isolated                        | 0D | disordered                                                             | 168500    |
| 61 | $\text{Sr}_2\text{LiIn}(\text{B}_2\text{O}_5)_2$             | $\text{LiO}_5$                    | Isolated                        | 0D | Isolated $\text{B}_2\text{O}_5$                                        | 72486     |
| 62 | $\text{Sr}_2\text{ScLi}(\text{B}_4\text{O}_{10})$            | $\text{LiO}_5$                    | Isolated                        | 0D | Isolated $\text{B}_2\text{O}_5$                                        | 68429     |
| 63 | $\text{CsLi}_2\text{Gd}_4(\text{BO}_3)_5$                    | $\text{LiO}_5$                    | Vertex-sharing                  | 1D | Isolated $\text{BO}_3$                                                 | 240894    |
| 64 | $\text{Li}_2\text{Cu}_9\text{B}_{12}\text{O}_{28}$           | $\text{LiO}_5$                    | Vertex-sharing                  | 1D | Isolated $\text{B}_2\text{O}_5$ + Isolated $\text{B}_4\text{O}_9$      | 237525    |
| 65 | $\text{LiCa}(\text{BO}_3)$                                   | $\text{LiO}_5$                    | Vertex-sharing                  | 2D | Isolated $\text{BO}_3$                                                 | 99386     |
| 66 | $\text{LiBa}(\text{BO}_3)$                                   | $\text{LiO}_5$                    | Vertex-, edge-sharing           | 2D | Isolated $\text{BO}_3$                                                 | 92843     |
| 67 | $\text{LiSr}(\text{BO}_3)$                                   | $\text{LiO}_5$                    | Vertex-, edge-sharing           | 2D | Isolated $\text{BO}_3$                                                 | 92842     |
| 68 | $\text{Nd}_6\text{Li}(\text{BO}_3)_3\text{O}_4\text{F}_2$    | $\text{LiO}_6$                    | Isolated                        | 0D | Isolated $\text{BO}_3$                                                 | 260791    |
| 69 | $\text{Li}(\text{B}(\text{S}_2\text{O}_7)_2)$                | $\text{LiO}_6$                    | Isolated                        | 0D | Isolated $\text{BO}_4$                                                 | 425175    |
| 70 | $\text{Li}(\text{B}(\text{SO}_3\text{Cl})_4)$                | $\text{LiO}_6$                    | Isolated                        | 0D | Isolated $\text{BO}_4$                                                 | 16486     |
| 71 | $\text{LiSrTb}_2(\text{BO}_3)_3$                             | $\text{LiO}_6$                    | Isolated                        | 0D | disordered                                                             | 196283    |
| 72 | $\text{LiSrY}_2(\text{BO}_3)_3$                              | $\text{LiO}_6$                    | Isolated                        | 0D | disordered                                                             | 422091    |
| 73 | $\text{Li}(\text{Co}_{0.95}\text{B}_{0.05}\text{O}_2)$       | $\text{LiO}_6$                    | edge-sharing                    | 2D | disordered                                                             | 77880     |
| 74 | $\text{Li}_4\text{Cs}(\text{B}_5\text{O}_{10})$              | $\text{LiO}_4+$<br>$\text{LiO}_5$ | Vertex-, edge-sharing           | 0D | Isolated $\text{B}_5\text{O}_{10}$                                     | 251864    |
| 75 | $\text{LiB}_3\text{O}_5$                                     | $\text{LiO}_4+$<br>$\text{LiO}_5$ | Vertex-, edge-sharing           | 0D | $\text{BO}_3+\text{BO}_4$ network                                      | 422922    |
| 76 | $\text{Li}_3\text{CuB}_3\text{O}_7$                          | $\text{LiO}_4+$<br>$\text{LiO}_5$ | Vertex-, edge-sharing           | 1D | Isolated $\text{B}_2\text{O}_5+$<br>Isolated $\text{B}_3\text{O}_7$    | 237524    |
| 77 | $\text{Li}_8\text{Cu}_7\text{B}_{14}\text{O}_{32}$           | $\text{LiO}_4+$<br>$\text{LiO}_5$ | Vertex-, edge-sharing           | 1D | Isolated $\text{B}_2\text{O}_5+$<br>Isolated $\text{B}_5\text{O}_{11}$ | 237527    |
| 78 | $\text{Li}_3\text{Cs}_2(\text{B}_5\text{O}_{10})$            | $\text{LiO}_4+$                   | Vertex-, edge-                  | 2D | Isolated $\text{B}_5\text{O}_{10}$                                     | 180730    |

|    |                                                                                |                                                                                    |                       |    |                                          |        |
|----|--------------------------------------------------------------------------------|------------------------------------------------------------------------------------|-----------------------|----|------------------------------------------|--------|
|    |                                                                                | LiO <sub>5</sub>                                                                   | sharing               |    |                                          |        |
| 79 | Li <sub>6</sub> Rb <sub>5</sub> (B <sub>11</sub> O <sub>22</sub> )             | LiO <sub>4</sub> <sup>+</sup><br>LiO <sub>5</sub>                                  | Vertex-, edge-sharing | 2D | Isolated B <sub>11</sub> O <sub>22</sub> | 183434 |
| 80 | Li <sub>4</sub> CaB <sub>2</sub> O <sub>6</sub>                                | LiO <sub>4</sub> <sup>+</sup><br>LiO <sub>5</sub>                                  | Vertex-, edge-sharing | 3D | Isolated BO <sub>3</sub>                 | 239000 |
| 81 | NaLi <sub>2</sub> BO <sub>3</sub>                                              | LiO <sub>4</sub> <sup>+</sup><br>LiO <sub>5</sub>                                  | Vertex-, edge-sharing | 3D | Isolated BO <sub>3</sub>                 | 62532  |
| 82 | Li <sub>3</sub> In(B <sub>2</sub> O <sub>6</sub> )                             | LiO <sub>4</sub> <sup>+</sup><br>LiO <sub>5</sub>                                  | Vertex-, edge-sharing | 3D | Isolated BO <sub>3</sub>                 | 94355  |
| 83 | Li <sub>6</sub> Gd(BO <sub>3</sub> ) <sub>3</sub>                              | LiO <sub>4</sub> <sup>+</sup><br>LiO <sub>5</sub>                                  | Vertex-, edge-sharing | 3D | Isolated BO <sub>3</sub>                 | 96123  |
| 84 | Li <sub>6</sub> Ho(BO <sub>3</sub> ) <sub>3</sub>                              | LiO <sub>4</sub> <sup>+</sup><br>LiO <sub>5</sub>                                  | Vertex-, edge-sharing | 3D | Isolated BO <sub>3</sub>                 | 2121   |
| 85 | Li <sub>6</sub> Yb(BO <sub>3</sub> ) <sub>3</sub>                              | LiO <sub>4</sub> <sup>+</sup><br>LiO <sub>5</sub>                                  | Vertex-, edge-sharing | 3D | Isolated BO <sub>3</sub>                 | 200079 |
| 86 | Li <sub>6</sub> Y(BO <sub>3</sub> ) <sub>3</sub>                               | LiO <sub>4</sub> <sup>+</sup><br>LiO <sub>5</sub>                                  | Vertex-, edge-sharing | 3D | Isolated BO <sub>3</sub>                 | 68653  |
| 87 | Li <sub>6</sub> Nd(BO <sub>3</sub> ) <sub>3</sub>                              | LiO <sub>4</sub> <sup>+</sup><br>LiO <sub>5</sub>                                  | Vertex-, edge-sharing | 3D | Isolated BO <sub>3</sub>                 | 164145 |
| 88 | Li <sub>6</sub> B <sub>4</sub> O <sub>9</sub>                                  | LiO <sub>4</sub> <sup>+</sup><br>LiO <sub>5</sub>                                  | Vertex-, edge-sharing | 3D | Isolated B <sub>4</sub> O <sub>9</sub>   | 427421 |
| 89 | Li <sub>6</sub> Ga <sub>2</sub> (BO <sub>3</sub> ) <sub>4</sub>                | LiO <sub>4</sub> <sup>+</sup><br>LiO <sub>6</sub>                                  | Vertex-, edge-sharing | 2D | Isolated BO <sub>3</sub>                 | 9987   |
| 90 | Li <sub>3</sub> Nd <sub>2</sub> (BO <sub>3</sub> ) <sub>3</sub>                | LiO <sub>3</sub> <sup>+</sup><br>LiO <sub>4</sub>                                  | Vertex-sharing        | 1D | Isolated BO <sub>3</sub>                 | 200078 |
| 91 | Li <sub>2</sub> Yb <sub>5</sub> O <sub>4</sub> (BO <sub>3</sub> ) <sub>3</sub> | LiO <sub>3</sub> <sup>+</sup><br>LiO <sub>5</sub>                                  | Vertex-, edge-sharing | 1D | Isolated BO <sub>3</sub>                 | 51442  |
| 92 | Li <sub>14</sub> Be <sub>5</sub> B(BO <sub>3</sub> ) <sub>9</sub>              | LiO <sub>3</sub> <sup>+</sup><br>LiO <sub>4</sub> <sup>+</sup><br>LiO <sub>6</sub> | Vertex-, edge-sharing | 3D | Isolated BO <sub>3</sub>                 | 67991  |

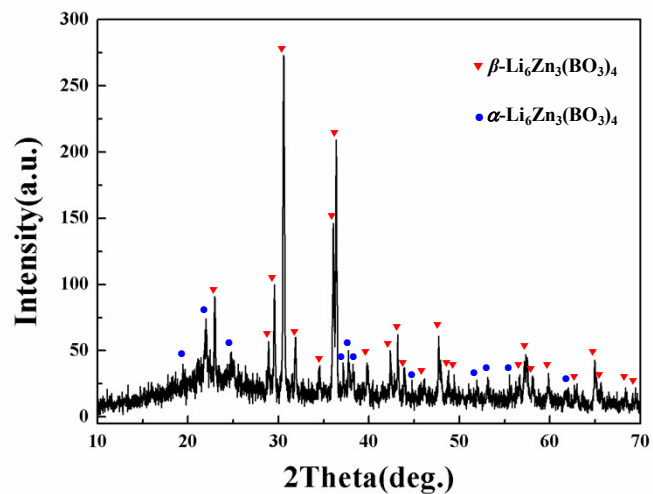

Fig. S1. The PXRD pattern of  $\text{Li}_6\text{Zn}_3(\text{BO}_3)_4$  obtained by quenching method using liquid nitrogen at 400 °C.

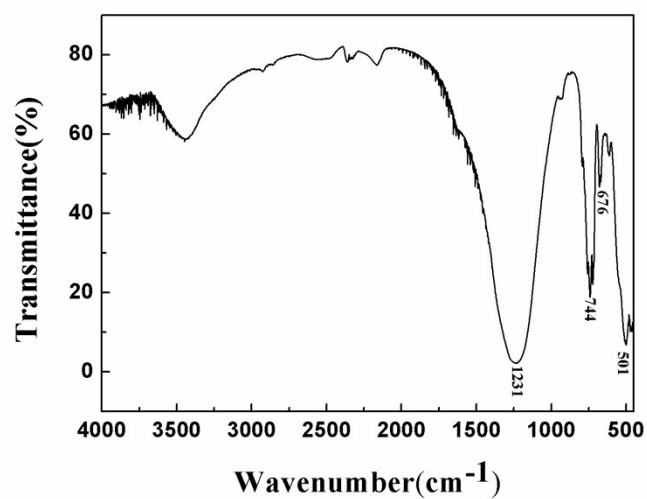

Fig. S2. IR spectrum of  $\text{Li}_6\text{Zn}_3(\text{BO}_3)_4$ .

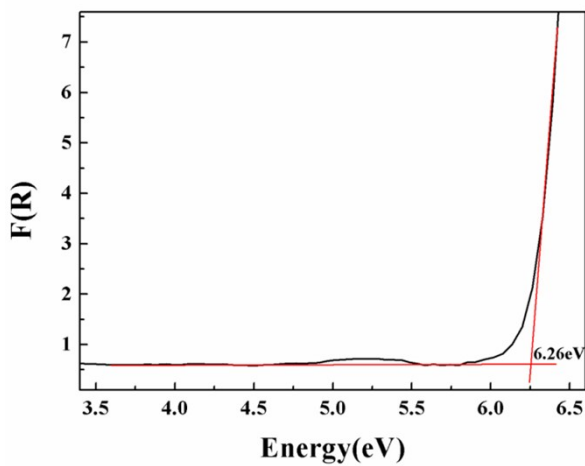

Fig. S3. Absorption spectrum for  $\text{Li}_6\text{Zn}_3(\text{BO}_3)_4$ .



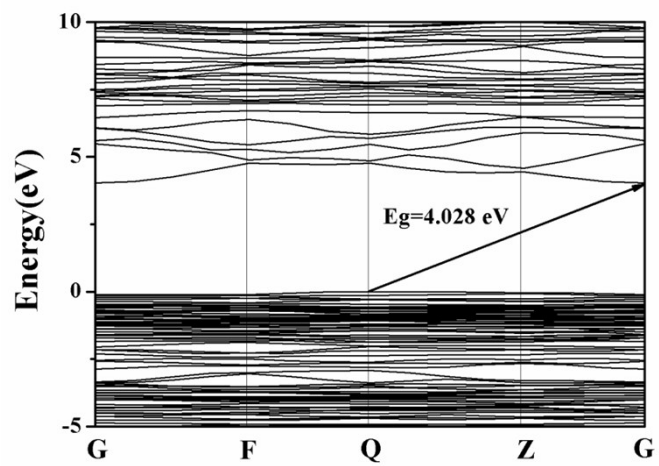

**Fig. S4.** Calculated band structure of  $\text{Li}_6\text{Zn}_3(\text{BO}_3)_4$ .
